# Supplementary material for: Phosphorylated Trehalose Suppresses the Denaturation of Myofibrillar Proteins in Peeled Shrimp (Litopenaeus vannamei) during Long-Term Frozen Storage
Source: MDPI journal article supplement (doi:10.3390/foods11203189), 2022-10-13
Supplement: s1 [file s1]

Table S1 P values of Two-way ANOVA for main effects and interactions for the different variables measured in peeled shrimp.

| Source of Variation        | WHC<br>(Thawing loss) | WHC<br>(Cooking loss) | Myofibrillar proteins content | Ca <sup>2+</sup> -ATPase activity | Total sulphhydryl content | Surface hydrophobicity | Thermal stability (Myosin $T_{max}$ ) | Thermal stability (Myosin $\Delta H$ ) | Thermal stability (Actin $T_{max}$ ) | Thermal stability (Actin $\Delta H$ ) |
|----------------------------|-----------------------|-----------------------|-------------------------------|-----------------------------------|---------------------------|------------------------|---------------------------------------|----------------------------------------|--------------------------------------|---------------------------------------|
| Cryopreservative treatment | 3.495E-24             | 6.759E-27             | 1.700E-25                     | 1.435E-31                         | 4.894E-28                 | 0.0375                 | 1.532E-37                             | 3.173E-32                              | 1.669E-33                            | 0.0375                                |
| Storage time               | 2.962E-27             | 3.011E-39             | 2.621E-17                     | 1.602E-18                         | 4.451E-13                 | 0.2539                 | 5.792E-21                             | 5.022E-16                              | 1.057E-18                            | 0.2539                                |
| Interaction                | 3.168E-10             | 1.121E-09             | 2.548E-09                     | 6.596E-08                         | 0.0002689                 | 0.4252                 | 1.476E-08                             | 0.02491                                | 1.759E-08                            | 0.4252                                |

Table S2 Two-way ANOVA for WHC including thawing loss and cooking loss of peeled shrimp.

| 1.Two-way ANOVA results (Thawing loss) |                |                   |  |  |  |  |  |
|----------------------------------------|----------------|-------------------|--|--|--|--|--|
|                                        |                |                   |  |  |  |  |  |
| 1                                      | Table Analyzed | Thawing loss Data |  |  |  |  |  |
| 2                                      |                |                   |  |  |  |  |  |
| 3                                      | Two-way ANOVA  | Ordinary          |  |  |  |  |  |
| 4                                      | Alpha          | 0.05              |  |  |  |  |  |

|                                        |                                                |                   |    |         |       |           |        |
|----------------------------------------|------------------------------------------------|-------------------|----|---------|-------|-----------|--------|
| 5                                      |                                                |                   |    |         |       |           |        |
| 6                                      | Source of Variation                            | SS                | DF | MS      | F     | P value   | F crit |
| 7                                      | Cryopreservative treatment                     | 19.88             | 4  | 4.970   | 162.9 | 3.495E-24 | 2.606  |
| 8                                      | Storage time                                   | 26.84             | 3  | 8.946   | 293.2 | 2.962E-27 | 2.839  |
| 9                                      | Interaction                                    | 4.725             | 12 | 0.3937  | 12.90 | 3.168E-10 | 2.003  |
| 10                                     | Residual                                       | 1.221             | 40 | 0.03051 |       |           |        |
| 11                                     |                                                |                   |    |         |       |           |        |
| 12                                     | Data summary                                   |                   |    |         |       |           |        |
| 13                                     | Number of columns (Cryopreservative treatment) | 4                 |    |         |       |           |        |
| 14                                     | Number of rows (Storage time)                  | 5                 |    |         |       |           |        |
| 15                                     | Number of values                               | 60                |    |         |       |           |        |
| 2.Two-way ANOVA results (Cooking loss) |                                                |                   |    |         |       |           |        |
|                                        |                                                |                   |    |         |       |           |        |
| 1                                      | Table Analyzed                                 | Cooking loss Data |    |         |       |           |        |
| 2                                      |                                                |                   |    |         |       |           |        |
| 3                                      | Two-way ANOVA                                  | Ordinary          |    |         |       |           |        |
| 4                                      | Alpha                                          | 0.05              |    |         |       |           |        |
| 5                                      |                                                |                   |    |         |       |           |        |

|    |                                                |       |    |         |       |           |        |
|----|------------------------------------------------|-------|----|---------|-------|-----------|--------|
| 6  | Source of Variation                            | SS    | DF | MS      | F     | P value   | F crit |
| 7  | Cryopreservative treatment                     | 58.29 | 4  | 14.57   | 226.4 | 6.759E-27 | 2.606  |
| 8  | Storage time                                   | 233.0 | 3  | 77.67   | 1206  | 3.011E-39 | 2.839  |
| 9  | Interaction                                    | 9.147 | 12 | 0.7622  | 11.84 | 1.121E-09 | 2.003  |
| 10 | Residual                                       | 2.574 | 40 | 0.06435 |       |           |        |
| 11 |                                                |       |    |         |       |           |        |
| 12 | Data summary                                   |       |    |         |       |           |        |
| 13 | Number of columns (Cryopreservative treatment) | 4     |    |         |       |           |        |
| 14 | Number of rows (Storage time)                  | 5     |    |         |       |           |        |
| 15 | Number of values                               | 60    |    |         |       |           |        |

Table S3 Two-way ANOVA for myofibrillar proteins (MP) content in peeled shrimp.

|                                      |                |                 |  |  |  |  |
|--------------------------------------|----------------|-----------------|--|--|--|--|
| 1.Two-way ANOVA results (MP content) |                |                 |  |  |  |  |
|                                      |                |                 |  |  |  |  |
| 1                                    | Table Analyzed | MP content Data |  |  |  |  |
| 2                                    |                |                 |  |  |  |  |
| 3                                    | Two-way ANOVA  | Ordinary        |  |  |  |  |
| 4                                    | Alpha          | 0.05            |  |  |  |  |
| 5                                    |                |                 |  |  |  |  |

|    |                                                |       |    |       |       |           |        |
|----|------------------------------------------------|-------|----|-------|-------|-----------|--------|
| 6  | Source of Variation                            | SS    | DF | MS    | F     | P value   | F crit |
| 7  | Cryopreservative treatment                     | 7276  | 4  | 1819  | 191.2 | 1.700E-25 | 2.606  |
| 8  | Storage time                                   | 2397  | 3  | 799.0 | 83.95 | 2.621E-17 | 2.839  |
| 9  | Interaction                                    | 1278  | 12 | 106.5 | 11.19 | 2.548E-09 | 2.003  |
| 10 | Residual                                       | 380.7 | 40 | 9.517 |       |           |        |
| 11 |                                                |       |    |       |       |           |        |
| 12 | Data summary                                   |       |    |       |       |           |        |
| 13 | Number of columns (Cryopreservative treatment) | 4     |    |       |       |           |        |
| 14 | Number of rows (Storage time)                  | 5     |    |       |       |           |        |
| 15 | Number of values                               | 60    |    |       |       |           |        |

Table S4 Two-way ANOVA for Ca<sup>2+</sup>-ATPase activity of MP in peeled shrimp.

| 1. Two-way ANOVA results (Ca <sup>2+</sup> -ATPase activity) |                |                                        |  |  |  |  |  |
|--------------------------------------------------------------|----------------|----------------------------------------|--|--|--|--|--|
|                                                              |                |                                        |  |  |  |  |  |
| 1                                                            | Table Analyzed | Ca <sup>2+</sup> -ATPase activity Data |  |  |  |  |  |
| 2                                                            |                |                                        |  |  |  |  |  |
| 3                                                            | Two-way ANOVA  | Ordinary                               |  |  |  |  |  |

|    |                                                |          |    |           |       |           |        |
|----|------------------------------------------------|----------|----|-----------|-------|-----------|--------|
| 4  | Alpha                                          | 0.05     |    |           |       |           |        |
| 5  |                                                |          |    |           |       |           |        |
| 6  | Source of Variation                            | SS       | DF | MS        | F     | P value   | F crit |
| 7  | Cryopreservative treatment                     | 0.05784  | 4  | 0.01446   | 395.3 | 1.435E-31 | 2.606  |
| 8  | Storage time                                   | 0.01082  | 3  | 0.0036    | 98.60 | 1.602E-18 | 2.839  |
| 9  | Interaction                                    | 0.003881 | 12 | 0.0003    | 8.841 | 6.596E-08 | 2.003  |
| 10 | Residual                                       | 0.001463 | 40 | 3.658E-05 |       |           |        |
| 11 |                                                |          |    |           |       |           |        |
| 12 | Data summary                                   |          |    |           |       |           |        |
| 13 | Number of columns (Cryopreservative treatment) | 4        |    |           |       |           |        |
| 14 | Number of rows (Storage time)                  | 5        |    |           |       |           |        |
| 15 | Number of values                               | 60       |    |           |       |           |        |

Table S5 Two-way ANOVA for total sulphydryl (T-SH) content of MP in peeled shrimp.

|                                         |                |                      |  |  |  |  |  |
|-----------------------------------------|----------------|----------------------|--|--|--|--|--|
| 1.Two-way ANOVA results (T-SH content ) |                |                      |  |  |  |  |  |
|                                         |                |                      |  |  |  |  |  |
| 1                                       | Table Analyzed | T-SH content<br>Data |  |  |  |  |  |

|    |                                                |          |    |       |       |           |        |
|----|------------------------------------------------|----------|----|-------|-------|-----------|--------|
| 2  |                                                |          |    |       |       |           |        |
| 3  | Two-way ANOVA                                  | Ordinary |    |       |       |           |        |
| 4  | Alpha                                          | 0.05     |    |       |       |           |        |
| 5  |                                                |          |    |       |       |           |        |
| 6  | Source of Variation                            | SS       | DF | MS    | F     | P value   | F crit |
| 7  | Cryopreservative treatment                     | 1083     | 4  | 270.8 | 259.7 | 4.894E-28 | 2.606  |
| 8  | Storage time                                   | 144.8    | 3  | 48.28 | 46.30 | 4.451E-13 | 2.839  |
| 9  | Interaction                                    | 52.97    | 12 | 4.414 | 4.233 | 0.0002689 | 2.003  |
| 10 | Residual                                       | 41.71    | 40 | 1.043 |       |           |        |
| 11 |                                                |          |    |       |       |           |        |
| 12 | Data summary                                   |          |    |       |       |           |        |
| 13 | Number of columns (Cryopreservative treatment) | 4        |    |       |       |           |        |
| 14 | Number of rows (Storage time)                  | 5        |    |       |       |           |        |
| 15 | Number of values                               | 60       |    |       |       |           |        |

Table S6 Two-way ANOVA for surface hydrophobicity of MP in peeled shrimp.

|                                                   |  |  |  |  |  |  |
|---------------------------------------------------|--|--|--|--|--|--|
| 1.Two-way ANOVA results (Surface hydrophobicity ) |  |  |  |  |  |  |
|                                                   |  |  |  |  |  |  |

|    |                                                |                                            |    |       |       |         |        |
|----|------------------------------------------------|--------------------------------------------|----|-------|-------|---------|--------|
| 1  | Table Analyzed                                 | <b>Surface<br/>hydrophobicity<br/>Data</b> |    |       |       |         |        |
| 2  |                                                |                                            |    |       |       |         |        |
| 3  | Two-way ANOVA                                  | Ordinary                                   |    |       |       |         |        |
| 4  | Alpha                                          | 0.05                                       |    |       |       |         |        |
| 5  |                                                |                                            |    |       |       |         |        |
| 6  | Source of Variation                            | SS                                         | DF | MS    | F     | P value | F crit |
| 7  | Cryopreservative treatment                     | 9015                                       | 4  | 2539  | 10.09 | 0.0375  | 2.606  |
| 8  | Storage time                                   | 986.3                                      | 3  | 328.9 | 1.411 | 0.2539  | 2.839  |
| 9  | Interaction                                    | 2938                                       | 12 | 244.9 | 1.051 | 0.4252  | 2.003  |
| 10 | Residual                                       | 9325                                       | 40 | 233.1 |       |         |        |
| 11 |                                                |                                            |    |       |       |         |        |
| 12 | Data summary                                   |                                            |    |       |       |         |        |
| 13 | Number of columns (Cryopreservative treatment) | 4                                          |    |       |       |         |        |
| 14 | Number of rows (Storage time)                  | 5                                          |    |       |       |         |        |
| 15 | Number of values                               | 60                                         |    |       |       |         |        |

Table S7 Two-way ANOVA for the thermal stability ( $T_{\max}$  and  $\Delta H$ ) of myosin and actin in peeled shrimp

| 1.Two-way ANOVA results (Myosin $T_{\max}$ ) |                                                |                                              |    |        |       |           |        |
|----------------------------------------------|------------------------------------------------|----------------------------------------------|----|--------|-------|-----------|--------|
| 1                                            | Table Analyzed                                 | <b>Myosin <math>T_{\max}</math><br/>Data</b> |    |        |       |           |        |
| 2                                            |                                                |                                              |    |        |       |           |        |
| 3                                            | Two-way ANOVA                                  | Ordinary                                     |    |        |       |           |        |
| 4                                            | Alpha                                          | 0.05                                         |    |        |       |           |        |
| 5                                            |                                                |                                              |    |        |       |           |        |
| 6                                            | Source of Variation                            | SS                                           | DF | MS     | F     | P value   | F crit |
| 7                                            | Cryopreservative treatment                     | 159.7                                        | 4  | 39.91  | 796.5 | 1.532E-37 | 2.606  |
| 8                                            | Storage time                                   | 20.30                                        | 3  | 6.768  | 135.0 | 5.792E-21 | 2.839  |
| 9                                            | Interaction                                    | 5.939                                        | 12 | 0.4949 | 9.876 | 1.476E-08 | 2.003  |
| 10                                           | Residual                                       | 2.005                                        | 40 | 0.0501 |       |           |        |
| 11                                           |                                                |                                              |    |        |       |           |        |
| 12                                           | Data summary                                   |                                              |    |        |       |           |        |
| 13                                           | Number of columns (Cryopreservative treatment) | 4                                            |    |        |       |           |        |
| 14                                           | Number of rows (Storage time)                  | 5                                            |    |        |       |           |        |
| 15                                           | Number of values                               | 60                                           |    |        |       |           |        |



|                                                               |                                                |                                          |    |           |       |           |        |
|---------------------------------------------------------------|------------------------------------------------|------------------------------------------|----|-----------|-------|-----------|--------|
| <b>2.Two-way ANOVA results (Myosin <math>\Delta H</math>)</b> |                                                |                                          |    |           |       |           |        |
|                                                               |                                                |                                          |    |           |       |           |        |
| 1                                                             | Table Analyzed                                 | <b>Myosin <math>\Delta H</math> Data</b> |    |           |       |           |        |
| 2                                                             |                                                |                                          |    |           |       |           |        |
| 3                                                             | Two-way ANOVA                                  | Ordinary                                 |    |           |       |           |        |
| 4                                                             | Alpha                                          | 0.05                                     |    |           |       |           |        |
| 5                                                             |                                                |                                          |    |           |       |           |        |
| 6                                                             | Source of Variation                            | SS                                       | DF | MS        | F     | P value   | F crit |
| 7                                                             | Cryopreservative treatment                     | 0.1617                                   | 4  | 0.04042   | 427.1 | 3.173E-32 | 2.606  |
| 8                                                             | Storage time                                   | 0.02003                                  | 3  | 0.006676  | 70.55 | 5.022E-16 | 2.839  |
| 9                                                             | Interaction                                    | 0.002600                                 | 12 | 0.0002167 | 2.290 | 0.02491   | 2.003  |
| 10                                                            | Residual                                       | 0.003785                                 | 40 | 9.463E-05 |       |           |        |
| 11                                                            |                                                |                                          |    |           |       |           |        |
| 12                                                            | Data summary                                   |                                          |    |           |       |           |        |
| 13                                                            | Number of columns (Cryopreservative treatment) | 4                                        |    |           |       |           |        |
| 14                                                            | Number of rows (Storage time)                  | 5                                        |    |           |       |           |        |
| 15                                                            | Number of values                               | 60                                       |    |           |       |           |        |
| <b>3.Two-way ANOVA results (Actin <math>T_{\max}</math>)</b>  |                                                |                                          |    |           |       |           |        |
|                                                               |                                                |                                          |    |           |       |           |        |

|                                                              |                                                |                                         |    |           |        |           |        |
|--------------------------------------------------------------|------------------------------------------------|-----------------------------------------|----|-----------|--------|-----------|--------|
| 1                                                            | Table Analyzed                                 | <b>Actin <math>T_{\max}</math> Data</b> |    |           |        |           |        |
| 2                                                            |                                                |                                         |    |           |        |           |        |
| 3                                                            | Two-way ANOVA                                  | Ordinary                                |    |           |        |           |        |
| 4                                                            | Alpha                                          | 0.05                                    |    |           |        |           |        |
| 5                                                            |                                                |                                         |    |           |        |           |        |
| 6                                                            | Source of Variation                            | SS                                      | DF | MS        | F      | P value   | F crit |
| 7                                                            | Cryopreservative treatment                     | 0.02377                                 | 4  | 0.005941  | 496.5  | 1.669E-33 | 2.606  |
| 8                                                            | Storage time                                   | 0.003624                                | 3  | 0.001208  | 101.0  | 1.057E-18 | 2.839  |
| 9                                                            | Interaction                                    | 0.001400                                | 12 | 0.0001167 | 9.7510 | 1.759E-08 | 2.003  |
| 10                                                           | Residual                                       | 0.0004787                               | 40 | 1.197E-05 |        |           |        |
| 11                                                           |                                                |                                         |    |           |        |           |        |
| 12                                                           | Data summary                                   |                                         |    |           |        |           |        |
| 13                                                           | Number of columns (Cryopreservative treatment) | 4                                       |    |           |        |           |        |
| 14                                                           | Number of rows (Storage time)                  | 5                                       |    |           |        |           |        |
| 15                                                           | Number of values                               | 60                                      |    |           |        |           |        |
| <b>4.Two-way ANOVA results (Actin <math>\Delta H</math>)</b> |                                                |                                         |    |           |        |           |        |
|                                                              |                                                |                                         |    |           |        |           |        |
| 1                                                            | Table Analyzed                                 | <b>Actin <math>\Delta H</math> Data</b> |    |           |        |           |        |
| 2                                                            |                                                |                                         |    |           |        |           |        |

|    |                                                |          |    |       |       |         |        |
|----|------------------------------------------------|----------|----|-------|-------|---------|--------|
| 3  | Two-way ANOVA                                  | Ordinary |    |       |       |         |        |
| 4  | Alpha                                          | 0.05     |    |       |       |         |        |
| 5  |                                                |          |    |       |       |         |        |
| 6  | Source of Variation                            | SS       | DF | MS    | F     | P value | F crit |
| 7  | Cryopreservative treatment                     | 9015     | 4  | 2539  | 10.09 | 0.0375  | 2.606  |
| 8  | Storage time                                   | 986.3    | 3  | 328.9 | 1.411 | 0.2539  | 2.839  |
| 9  | Interaction                                    | 2938     | 12 | 244.9 | 1.051 | 0.4252  | 2.003  |
| 10 | Residual                                       | 9325     | 40 | 233.1 |       |         |        |
| 11 |                                                |          |    |       |       |         |        |
| 12 | Data summary                                   |          |    |       |       |         |        |
| 13 | Number of columns (Cryopreservative treatment) | 4        |    |       |       |         |        |
| 14 | Number of rows (Storage time)                  | 5        |    |       |       |         |        |
| 15 | Number of values                               | 60       |    |       |       |         |        |
